# Supplementary material for: Effects of Hydrogen Sulfide on Sugar, Organic Acid, Carotenoid, and Polyphenol Level in Tomato Fruit
Source: MDPI journal article supplement (doi:10.3390/plants12040719), 2023-02-06
Supplement: s1 [file s1]

**Supplementary Table S1. Primers used for RT-qPCR assays.**

| Gene name       | Accession NO. | Forward primer (5'-3')     | Reverse primer (5'-3')    |
|-----------------|---------------|----------------------------|---------------------------|
| <i>PFPP</i>     | 101243849     | GAGATCCACACGGCAATGTCCAG    | CCTTCTGCTTCCTCTGATCCAATC  |
| <i>ATPPF</i>    | 101245480     | CACGGCTTCTTGCTCAACCAATC    | CTTTGTGAGTGCTGTCGCTTATGC  |
| <i>FBA6</i>     | 101243907     | TAACATGGTCACCCCTGGCTCTG    | CCTCTTCCTCACTCTGTCCTCTG   |
| <i>GPI</i>      | 101262594     | CATTCGCTTTCTGGGACTGGGTAG   | ATGGTGCTGAGAGGAAATGCTGATC |
| <i>GPD1</i>     | 101249507     | GCCGTATTCTGTTGGTATCTTTCTCG | TTCGTGCTCAGATATTGCCTTGTC  |
| <i>POL2</i>     | 101259276     | TGCTCTCACCTCATCGGACAAG     | CCTCCTCGGAATCGTACAGTTTCAC |
| <i>MDH</i>      | 543805        | ATGAGGTGTCCAGGATGCAGAATG   | TCCAATAAGCCAGCTCGTTCCATAC |
| <i>ME1</i>      | 544164        | TCCCTCCTCTCATCCTCCCTCTC    | CCCAGCTCCAGAAGATCCAATCAAG |
| <i>ME2</i>      | 543522        | GCTCTCTCAAACCCAACCTCACAAG  | CTCATTGACACTGCGTACCTCACTC |
| <i>CSG</i>      | 101260902     | ACAGCATTACAGAGTTCCACAAGG   | AAGCATTAGCGGGTGACGAATCTG  |
| <i>CS3</i>      | 101258079     | TGCGATGGAGAACAAGTTGACTCTG  | TGCTTGGTGCCTGCCTATTATTGG  |
| <i>CSM</i>      | 101249011     | GTCTTTCTCCGCCTCTGTCTGTTTG  | GCTCGGCAATATGGGATCGTGAC   |
| <i>PAL5</i>     | 101244220     | GCCATCTAATCTCACAGCAGGAAGG  | AAGTCCGAGCAGTAAGAAGCCATC  |
| <i>4CL</i>      | 101249624     | ACCGCCTATTGTTCTCGCCATTG    | GCTCGGACGGCATCTTCAAGTTC   |
| <i>MDHAR</i>    | 778288        | TGCTTCTCCACCATAACCCATTGC   | GCGCGAAAGTTCAACAAGATCAGTG |
| <i>DHAR1</i>    | 778229        | AAGAAGTGGAGTGTGCCTGAAAGC   | CACGCATACAAGGACACGGTGAG   |
| <i>ZDS</i>      | 543629        | CCAGTGGTGCGGGCTTTAGTTG     | CAAGTAGTGCGGAGAGGACAGAAAC |
| <i>CCD7</i>     | 100313501     | CCATACCATCCGATTCCCTTCCG    | TCCTTAAGTAGCCGTGTCCGTCTAG |
| <i>CrtL-e-1</i> | 544129        | GTCTTGCTGGTCTTGCTCTTGC     | CTTTGAACTCGTCCTCCCATACACC |
| <i>psy1</i>     | 543988        | TTATGTTGCTGGTACGGTTGGGTTG  | CGCTCTCTGTTGTTGCCTTTGATTG |
| <i>LCY1</i>     | 544104        | GTTGTTGTGGATCTTGCTGTGGTTG  | AGAGAGTCCTGCTTCAGAACTTGC  |
| <i>PDS</i>      | 544073        | TTATCTCGCAAGTGTGGCTATGGTG  | GAAGATGCCTGCTTTCGGTGATTG  |
| <i>CHS1</i>     | 778294        | ATGGTCACCGTGGAGGAGTATCG    | AGGCGTAGATGTTCCAATGGCTAAG |
| <i>CHS2</i>     | 778295        | GCCGACTACCAACTCACCAAGC     | TCCCACCAGCAAAGCAACCTTG    |
| <i>F3H</i>      | 100736482     | GAGGCAATGGGCTTAGAGAAAGAGG  | GGTAATGGTTCCTGGATCGGTGTG  |
| <i>FLS</i>      | 102577717     | ACCTTGAATGAGTCGGTGTGTTGTG  | GAGCCAGATTGTGGTCAGGTGTTG  |
| <i>ACTIN</i>    | NC_015447.3   | AATGAACCTTCGTGTGGCTCCAGAG  | ATGGCAGGGGTGTTGAAGGTTTC   |
